# Supplementary material
Source: publisher figshare collection journal article supplement (https://gsajournals.figshare.com/ndownloader/files/25467782)
Supplement: Supplementary file 1 [file 25467782]

## Sheet: Sheet1
Table S3. Galactose growth phenotyping of key species.
Species	Controls		1st streak		2nd streak
	YPD	2% Glu	2% Gal	1% Gal	2% Gal	1%Gal
Brettanomyces anomalus	+	+	-	-	NT	NT
Brettanomyces naardensis	+	+	+	+	+	+
Kluyveromyces marxianus	+	+	NT	+	NT	+
Metschnikowia bicuspidata var. bicuspidata	+	+	NT	+	NT	+
Nadsonia fulvescens var. fulvescens	+	+	+	-	+	NT
Ogataea parapolymorpha	+	+	-	-	-	-
Zygosaccharomyces bailii	+	+	-	-	NT	NT
Starmerella bombicola	+	+	+	+	+	+
Wicerhamomyces anomalus	+	+	+	+	+	+
NT, not tested; +, growth; –, no growth
